# Supplementary material
Source: PubMed Central journal article supplement (PMC6731679)
Supplement: pnas.1819027116.sapp.pdf [file pnas.1819027116.sapp.pdf]

# PNAS

www.pnas.org

1  
2 **Supplementary Information for Global change effects on plant communities are magnified by**  
3 **time and the number of global change factors imposed**

4  
5 Kimberly J. Komatsu\* ; Meghan L. Avolio; Nathan P. Lemoine; Forest Isbell; Emily Grman;  
6 Gregory R. Houseman; Sally E. Koerner; David S. Johnson; Kevin R. Wilcox; Juha M. Alatalo;  
7 John P. Anderson; Rien Aerts; Sara G. Baer; Andrew H. Baldwin; Jonathan Bates; Carl  
8 Beierkuhnlein; R. Travis Belote; John Blair; Juliette M.G. Bloor; Patrick J. Bohlen; Edward W.  
9 Bork; Elizabeth H. Boughton; William D. Bowman; Andrea J. Britton; James F. Cahill, Jr.;  
10 Enrique Chaneton; Nona Chiariello; Jimin Cheng; Scott L. Collins; J. Hans C. Cornelissen;  
11 Guozhen Du; Anu Eskelinen; Jennifer Firn; Bryan Foster; Laura Gough; Katherine Gross;  
12 Lauren M. Hallett; Xingguo Han; Harry Harmens; Mark J. Hovenden; Annika Jagerbrand; Anke  
13 Jentsch; Christel Kern; Kari Klanderud; Alan K. Knapp; Juergen Kreyling; Wei Li; Yiqi Luo;  
14 Rebecca L. McCulley; Jennie R. McLaren; J. Patrick Megonigal; John W. Morgan; Vladimir  
15 Onipchenko; Steven C. Pennings; Janet S. Prevéy; Jodi Price; Peter B. Reich; Clare H. Robinson;  
16 F. Leland Russell; Osvaldo E. Sala; Eric W. Seabloom; Melinda D. Smith; Nadejda A.  
17 Soudzilovskaia; Lara Souza; Katherine Suding; K. Blake Suttle; Tony Svejcar; David Tilman;  
18 Pedro Tognetti; Roy Turkington; Shannon White, Zhuwen Xu; Laura Yahdjian; Qiang Yu;  
19 Pengfei Zhang; Yunhai Zhang

20  
21 \*corresponding author: [komatsuk@si.edu](mailto:komatsuk@si.edu), 443-482-2218

22  
23 **This PDF file includes:**

24 Materials and Methods  
25 Appendix 1 – Table of coauthor contributions.  
26 Appendix 2 – Table of experiment information.  
27 Appendix 3 – Map of experiment locations.  
28 Appendix 4 – Experiment-level predictors of richness and composition responses.  
29 Appendix 5 – Regression coefficients of treatment magnitude effect on community differences.  
30 Appendix 6 – Experiment and Site Acknowledgements

31  
32 **Other supplementary materials for this manuscript include the following:**

33 Datasets S1  
34

35 **Materials and Methods**

36

37 *Data Collection*

38 Criteria for inclusion of a dataset in this analysis were as follows: (1) experimentally  
39 manipulate a resource (light, CO<sub>2</sub>, water, nutrients) relative to a control; (2) collect some  
40 measure of abundance for all species in the community (percent cover, pin hits, stem densities,  
41 biomass) to allow for calculation of our community metrics; (3) have at least 3 years of  
42 experimental manipulation to allow time for the plant community to respond; (4) have at least 4  
43 replicates of each treatment in order to allow a reliable variance estimate to be calculated; and (5)  
44 be in an herbaceous ecosystem (grassland, salt marsh, forest understory, etc.) to ensure a  
45 response would be observable within the relatively short time frame of most experimental  
46 manipulations. All treatments from these experiments (both resource and non-resource  
47 manipulation treatments) were included in the database.

48 Datasets were identified in three ways. First, a comprehensive literature search was  
49 performed in Web of Science using the keywords “plant community” combined with one of the  
50 following terms: “global change”, “nutrient”, “nitrogen”, “phosphorus”, “potassium”,  
51 “micronutrients”, “CO<sub>2</sub>”, “carbon dioxide”, “precipitation”, “rainfall”, “water”, “light”. The  
52 titles, abstracts, and methods of all papers returned from these searches were examined to  
53 determine whether the experiments described therein met our selection criteria. If the experiment  
54 did meet our selection criteria, authors were contacted with a request to provide their raw species  
55 composition data for this analysis. Second, long-term research stations were solicited to provide  
56 datasets that met our selection criteria. Third, investigators who working group members knew to  
57 have long-term global change experiments were solicited to provide datasets that met our  
58 selection criteria. Overall, we compiled a database of 105 experiments at 52 sites around the  
59 world (Appendices 2 and 3). The experiments represented in this database were conducted in  
60 intact, native-dominated herbaceous communities, with a few exceptions (highly invaded:  
61 Angelo Coast Range Reserve, Sedgewick Reserve, Spindletop Research Farm; assembled  
62 communities: Lindenhof Environmental Station LIND, Cedar Creek LTER BioCON, Konza  
63 LTER Prairie RHPs; translocated monoliths: Center for Ecology and Hydrology MEGARICH).  
64 Removal of the assembled communities from the analysis did not change our results.

65 For each dataset, we utilized both control and treatment plots for our analyses.  
66 Treatments included global change manipulations ranging from one to five simultaneously  
67 manipulated factors. The relative abundance of each species was determined for each plot in  
68 each year by dividing the species abundance by the sum of all species abundances.

69

70 *Statistical Analysis*

71 Four metrics of plant community differences were calculated for every year for each  
72 treatment within each experiment: (1) ln Response Ratio (lnRR) of richness differences; (2)  
73 percent (%) richness differences; (3) lnRR of effective species number (eH) differences; and (4)  
74 composition differences between the treatment and the control plots. lnRR of richness and  
75 effective species number differences were calculated as the natural log of the quotient of average  
76 richness or eH between treatment and control plots. Percent richness differences were calculated  
77 as the difference in average richness between treatment and control plots divided by the average  
78 richness of the control plots (*i.e.*, proportional difference). lnRR of richness differences, percent  
79 richness differences, and lnRR of eH differences were qualitatively similar, and therefore results  
80 are presented for lnRR of richness differences throughout, with the exception of Table 2 where

81 all three response metrics are shown. Composition differences were calculated using  
 82 multivariate\_difference function of the codyn package in R (Hallet, Avolio et al). Briefly, we  
 83 used Bray-Curtis as our dissimilarity metric to study compositional differences. Our dissimilarity  
 84 matrix was used to make a PCoA for each year of an experiment and composition responses  
 85 were calculated as the Euclidean distance between the centroids of the plant communities in the  
 86 control (*i.e.*, unmanipulated) plots. These composition responses are bounded between 0 and 1,  
 87 and can be altered by (a) species reordering; (b) species turnover; (c) differences in species  
 88 richness; and (d) differences in evenness (1).

89 Responses of the metrics of plant community differences to explanatory variables at the  
 90 treatment- and experiment-levels were evaluated. At the treatment level, the treatment type (*e.g.*,  
 91 CO<sub>2</sub> increase, nutrient addition, irrigation, drought, altered consumer pressure, burning,  
 92 temperature increase, etc; see Appendix 2) was used as the sole explanatory variable. At the  
 93 experiment level, gamma diversity and productivity were included as explanatory variables.  
 94 Gamma diversity was estimated for each experiment in our dataset as the rarefied number of  
 95 species identified across all control plots in all years of the experiment. Rarefied species number  
 96 was calculated using the vegan package (2) in R version 3.4.4 by first deriving species  
 97 accumulation curves for each experiment through resampling of the species richness across all  
 98 control plots in all years within each experiment using 100 permutations, and second determining  
 99 the rarified richness estimate at a sample size of 12 (the lowest sampling effort of control plots  
 100 across all experiments included in our dataset). Productivity was calculated as the average  
 101 aboveground biomass in the control (*i.e.*, unmanipulated) plots across all years of the  
 102 experiment. For experiments where biomass data were not collected (36 of 105 experiments),  
 103 individual investigators provided productivity estimates for the experiment based on expert  
 104 knowledge and the primary literature. At a single research site (*e.g.*, an LTER site), both gamma  
 105 diversity and productivity varied across experiments, but not across treatments within  
 106 experiments. At the site level, mean annual precipitation (MAP) was obtained from the  
 107 WorldCLIM database (<http://www.worldclim.org/>) using the latitude and longitude of the study  
 108 sites. MAP varied across sites, but not across treatments or experiments within sites.

109 We used a Bayesian, multivariate, hierarchical model to analyze richness responses and  
 110 composition responses. The two response variables (richness and composition responses)  
 111 constitute a  $N \times K$  response matrix  $Y_{jl}$ , where  $N$  is the number of observations,  $K$  is the number  
 112 of response variables, and  $j$  denotes the  $j^{th}$  experiment from the  $l^{th}$  site. We assumed that the  
 113 response variables were multivariate-normally distributed around predicted values:

$$114 \quad Y_{jl} \sim MVN \left( \hat{Y}_{jl}, \Sigma Y \right)$$

115 where  $\hat{Y}_{jl}$  is the matrix of predicted values for the  $j^{th}$  experiment at the  $l^{th}$  site, and  $\Sigma Y$  is  
 116 the covariance matrix of the response variables.

117 Time was standardized to a mean of 0 prior to analysis for each treatment. The predicted  
 118 values were quadratic functions of this standardized metric of time:

$$119 \quad \hat{Y}_{jl} = X_{jl} B_{jl}$$

120 where  $X_{jl}$  is the design matrix containing the intercept, linear, and quadratic terms for  
 121 experiment year, and  $B_{jl}$  is a  $3 \times K$  matrix containing parameter estimates for both responses.  
 122 The random experiment effects were multivariate-normally distributed around the predicted  
 123 experiment effect, which was based on site and the type of treatment manipulation. For example,  
 124 the random effects for overall community difference are denoted  $B_{jl}$  and were modeled as:

125  
126  
127  
128  
129  
130  
131  
132  
133  
134  
135  
136  
137  
138  
139  
140  
141  
142  
143  
144  
145  
146  
147  
148  
149  
150  
151  
152  
153  
154  
155  
156  
157  
158  
159  
160  
161  
162  
163  
164  
165  
166  
167  
168

$$B_{jl1} \sim MVN \left( G_{l1} + Z_{jl}U_1, \sum B_1 \right)$$

This equation states that the predicted value of the time series parameters in the  $j^{th}$  experiment were the site-level time series parameters ( $G_{l1}$ ), modified by treatment type. The design matrix  $Z_{jl}$  contains information on the type of treatment manipulated in the  $j^{th}$  experiment. Treatment type was an effects-coded variable, such that the intercept  $G_{l1}$  represents the overall average time series parameters for a site, and the parameters  $U_1$  are the deviations from the mean caused by global change treatment (as well as interactions with site-level ANPP/gamma diversity). The coefficients  $U_1$  were treated as fixed, and therefore constant for every experiment and site.

Mean community parameters were then multivariate-normally distributed around overall parameter estimates, augmented by site-level ANPP and rarefied gamma diversity:

$$G_{l1} \sim MVN \left( T_1 + E_l D_1, \sum G_1 \right)$$

Here,  $E_l$  contains ANPP and gamma diversity for the  $l^{th}$  site, and  $D_1$  contains the parameter estimates for ANPP and gamma diversity effects on each parameter. Because ANPP and gamma diversity were standardized to a mean of 0 prior to analysis, the vector  $T_1$  contains the average intercept, linear, and quadratic estimates in a site of average ANPP and gamma diversity. These analyses were identical for each response variable (*i.e.*, change subscript 1 to 2), and both response variables were standardized prior to analysis.

We placed weakly informative priors of  $N(0,1)$  on all parameter estimates for  $B$ ,  $U$ ,  $D$  and  $T$  (3). These priors state that it is unlikely to find an effect yielding greater than a one standard deviation change in the response variable, and enable us to make multiple comparisons without need for *post-hoc* corrections (<http://www.stat.columbia.edu/gelman/research/published/multiple2f.pdf>). We also placed weakly informative priors  $LKJ$  (2) on all covariance matrices. All models were also run using non-informative priors, and qualitatively similar results were obtained.

For each parameter, the 95% Bayesian credible interval (CI) was calculated from the posterior simulations. Parameters were considered to be significant if their 95% CI excluded zero. For all models, intercepts (*i.e.*, the initial magnitude of responses) were within the range of variability among control plots (*i.e.*, background variation) and are therefore not presented.

Effect size estimates for both metrics of community differences in the final year of each experiment for each treatment were also calculated, as described above. These effect sizes were used to compare the responsiveness of both metrics of plant community differences to global change manipulations using a Bayesian regression analysis examining the effect of the magnitude of either (a) N, (b) drought, or (c) irrigation treatment level on the effect sizes, as well as their interactions with mean annual precipitation (MAP). No other global change treatment in the CoRRE database included enough different levels to perform a similar regression. The N treatment magnitude was included in the model as the absolute amount of N added ( $g\ m^{-2}$ ), while the drought and irrigation treatment magnitudes were included as a percent change from MAP at the site. Global change manipulations were categorized into treatment categories (single resource, single non-resource, two-way interactions with both treatments manipulating resources, two-way interactions with both treatments manipulating non-resources, two-way interactions with one resource and one non-resource manipulation, three or more way interactions with all treatments manipulating resources, and three or more way interactions with both resource and non-resource manipulations). The number of significant and non-significant temporal trends

169 (either significant linear or quadratic effect sizes) across all treatments were tallied for richness  
170 and composition responses by single-factor global change treatment type (*e.g.*, nitrogen,  
171 phosphorus, irrigation, drought, etc) and category (*i.e.*, single resource, single non-resource,  
172 resource\*resource, non-resource\*non-resource, resource\*non-resource, three or more resources,  
173 and three or more resources and non-resources). The number of significant vs non-significant  
174 temporal trends for richness and composition responses were compared by treatment type and  
175 category using a Test of Equal Proportions, with post-hoc comparisons made using Fisher's  
176 Exact Test in R version 3.4.4. All Bayesian analyses were performed using Python version 3.6.5.

177  
178 **Data availability:** All data is available in the supplementary materials and Tables 2 and 3. All  
179 statistical code is archived on github in the following repository:

180 [https://github.com/klapierre/community\\_difference\\_synthesis](https://github.com/klapierre/community_difference_synthesis).

181

182

- 183 1. Avolio ML, et al. (2015) A framework for quantifying the magnitude and variability of  
184 community responses to global change drivers. *Ecosphere* 6(12):1–14.
- 185 2. Oksanen J, et al. (2018) Vegan: community ecology package. *R Package Version 2 4-6*.  
186 doi:10.1093/molbev/msv334.
- 187 3. Lemoine NP, et al. (2016) Underappreciated problems of low replication in ecological field  
188 studies. *Ecology* 97(12):3308–3314.

189

Appendix 1. Author contributions

| Author                | CoRRE<br>Leader | CoRRE<br>Member | CoRRE<br>Database | Provided<br>Raw Data | Developed<br>Research<br>Questions | Analyzed<br>Data | Contributed to<br>Data Analyses | Wrote<br>Paper | Contributed to<br>Paper Writing |
|-----------------------|-----------------|-----------------|-------------------|----------------------|------------------------------------|------------------|---------------------------------|----------------|---------------------------------|
| Kimberly J. Komatsu   | x               | x               | x                 | x                    | x                                  | x                | x                               | x              | x                               |
| Meghan L. Avolio      | x               | x               | x                 | x                    | x                                  | x                | x                               |                | x                               |
| Nathan P. Lemoine     |                 | x               |                   |                      | x                                  | x                | x                               |                | x                               |
| Forest Isbell         |                 | x               |                   | x                    | x                                  | x                | x                               |                | x                               |
| Emily Grman           |                 | x               |                   |                      | x                                  | x                | x                               |                | x                               |
| Gregory R. Houseman   |                 | x               |                   | x                    | x                                  |                  | x                               |                | x                               |
| Sally E. Koerner      |                 | x               |                   | x                    | x                                  |                  | x                               |                | x                               |
| David S. Johnson      |                 | x               |                   | x                    | x                                  |                  | x                               |                | x                               |
| Kevin R. Wilcox       |                 | x               |                   | x                    | x                                  |                  | x                               |                | x                               |
| Juha M. Alatalo       |                 |                 |                   | x                    |                                    |                  | x                               |                |                                 |
| John P. Anderson      |                 |                 |                   | x                    |                                    |                  |                                 |                |                                 |
| Rien Aerts            |                 |                 |                   | x                    |                                    |                  |                                 |                | x                               |
| Sara G. Baer          |                 |                 |                   | x                    |                                    |                  |                                 |                | x                               |
| Andrew H. Baldwin     |                 |                 |                   | x                    |                                    |                  |                                 |                | x                               |
| Jonathan Bates        |                 |                 |                   | x                    |                                    |                  |                                 |                | x                               |
| Carl Beierkuhnlein    |                 |                 |                   | x                    |                                    |                  |                                 |                | x                               |
| R. Travis Belote      |                 |                 |                   | x                    |                                    |                  |                                 |                | x                               |
| John Blair            |                 |                 |                   | x                    |                                    |                  |                                 |                |                                 |
| Juliette M. G. Bloor  |                 |                 |                   | x                    |                                    |                  | x                               |                | x                               |
| Patrick J. Bohlen     |                 |                 |                   | x                    |                                    |                  |                                 |                |                                 |
| Edward W. Bork        |                 |                 |                   | x                    |                                    |                  |                                 |                | x                               |
| Elizabeth H. Boughton |                 |                 |                   | x                    |                                    |                  |                                 |                | x                               |
| William D. Bowman     |                 |                 |                   | x                    |                                    |                  |                                 |                |                                 |
| Andrea J. Britton     |                 |                 |                   | x                    |                                    |                  | x                               |                | x                               |
| James F. Cahill, Jr.  |                 |                 |                   | x                    |                                    |                  | x                               |                |                                 |
| Enrique Chaneton      |                 |                 |                   | x                    |                                    |                  | x                               |                | x                               |
| Nona Chiariello       |                 |                 |                   | x                    |                                    |                  | x                               |                |                                 |
| Jimin Cheng           |                 |                 |                   | x                    |                                    |                  |                                 |                |                                 |

| Author                 | CoRRE<br>Leader | CoRRE<br>Member | CoRRE<br>Database | Provided<br>Raw Data | Developed<br>Research<br>Questions | Analyzed<br>Data | Contributed to<br>Data Analyses | Wrote<br>Paper | Contributed to<br>Paper Writing |
|------------------------|-----------------|-----------------|-------------------|----------------------|------------------------------------|------------------|---------------------------------|----------------|---------------------------------|
| Scott L. Collins       |                 |                 |                   | x                    |                                    |                  |                                 |                | x                               |
| J. Hans C. Cornelissen |                 |                 |                   | x                    |                                    |                  | x                               |                |                                 |
| Guozhen Du             |                 |                 |                   | x                    |                                    |                  |                                 |                |                                 |
| Anu Eskelinen          |                 |                 |                   | x                    |                                    |                  | x                               |                | x                               |
| Jennifer Firn          |                 |                 |                   | x                    |                                    |                  | x                               |                | x                               |
| Bryan Foster           |                 |                 |                   | x                    |                                    |                  |                                 |                | x                               |
| Laura Gough            |                 |                 |                   | x                    |                                    |                  | x                               |                | x                               |
| Katherine Gross        |                 |                 |                   | x                    |                                    |                  |                                 |                | x                               |
| Lauren M. Hallett      |                 |                 |                   | x                    |                                    |                  |                                 |                | x                               |
| Xingguo Han            |                 |                 |                   | x                    |                                    |                  |                                 |                |                                 |
| Harry Harmens          |                 |                 |                   | x                    |                                    |                  | x                               |                | x                               |
| Mark J. Hovenden       |                 |                 |                   | x                    |                                    |                  |                                 |                | x                               |
| Annika K. Jagerbrand   |                 |                 |                   | x                    |                                    |                  |                                 |                |                                 |
| Anke Jentsch           |                 |                 |                   | x                    |                                    |                  |                                 |                | x                               |
| Christel Kern          |                 |                 |                   | x                    |                                    |                  | x                               |                |                                 |
| Kari Klanderud         |                 |                 |                   | x                    |                                    |                  |                                 |                |                                 |
| Alan K. Knapp          |                 |                 |                   | x                    |                                    |                  |                                 |                | x                               |
| Juergen Kreyling       |                 |                 |                   | x                    |                                    |                  | x                               |                | x                               |
| Wei Li                 |                 |                 |                   | x                    |                                    |                  |                                 |                |                                 |
| Yiqi Luo               |                 |                 |                   | x                    |                                    |                  |                                 |                |                                 |
| Rebecca L. McCulley    |                 |                 |                   | x                    |                                    |                  | x                               |                | x                               |
| Jennie R. McLaren      |                 |                 |                   | x                    |                                    |                  | x                               |                | x                               |
| J. Patrick Megonigal   |                 |                 |                   | x                    |                                    |                  | x                               |                |                                 |
| Ulf Molau              |                 |                 |                   | x                    |                                    |                  |                                 |                |                                 |
| John Morgan            |                 |                 |                   | x                    |                                    |                  | x                               |                | x                               |
| Vladimir Onipchenko    |                 |                 |                   | x                    |                                    |                  | x                               |                |                                 |
| Steven C. Pennings     |                 |                 |                   | x                    |                                    |                  | x                               |                | x                               |
| Janet S. Prev y        |                 |                 |                   | x                    |                                    |                  |                                 |                | x                               |
| Jodi N. Price          |                 |                 |                   | x                    |                                    |                  | x                               |                | x                               |

| Author                  | CoRRE<br>Leader | CoRRE<br>Member | CoRRE<br>Database | Provided<br>Raw Data | Developed<br>Research<br>Questions | Analyzed<br>Data | Contributed to<br>Data Analyses | Wrote<br>Paper | Contributed to<br>Paper Writing |
|-------------------------|-----------------|-----------------|-------------------|----------------------|------------------------------------|------------------|---------------------------------|----------------|---------------------------------|
| Peter Reich             |                 |                 |                   | x                    |                                    |                  |                                 |                | x                               |
| Clare H. Robinson       |                 |                 |                   | x                    |                                    |                  |                                 |                |                                 |
| F. Leland Russell       |                 |                 |                   | x                    |                                    |                  |                                 |                | x                               |
| Oswaldo E. Sala         |                 |                 |                   | x                    |                                    |                  | x                               |                |                                 |
| Eric W. Seabloom        |                 |                 |                   | x                    |                                    |                  | x                               |                | x                               |
| Melinda D. Smith        |                 |                 |                   | x                    |                                    |                  |                                 |                | x                               |
| Nadia A. Soudzilovskaia |                 |                 |                   | x                    |                                    |                  | x                               |                | x                               |
| Lara Souza              |                 |                 |                   | x                    |                                    |                  | x                               |                | x                               |
| Katherine Suding        |                 |                 |                   | x                    |                                    |                  |                                 |                | x                               |
| K. Blake Suttle         |                 |                 |                   | x                    |                                    |                  | x                               |                | x                               |
| Tony Svejcar            |                 |                 |                   | x                    |                                    |                  |                                 |                | x                               |
| David Tilman            |                 |                 |                   | x                    |                                    |                  |                                 |                | x                               |
| Pedro Tognetti          |                 |                 |                   | x                    |                                    |                  | x                               |                | x                               |
| Roy Turkington          |                 |                 |                   | x                    |                                    |                  |                                 |                |                                 |
| Shannon R. White        |                 |                 |                   | x                    |                                    |                  |                                 |                |                                 |
| Zhuwen Xu               |                 |                 |                   | x                    |                                    |                  | x                               |                |                                 |
| Laura Yahdjian          |                 |                 |                   | x                    |                                    |                  |                                 |                | x                               |
| Qiang Yu                |                 |                 |                   | x                    |                                    |                  |                                 |                |                                 |
| Pengfei Zhang           |                 |                 |                   | x                    |                                    |                  |                                 |                | x                               |
| Yunhai Zhang            |                 |                 |                   | x                    |                                    |                  |                                 |                | x                               |



Appendix 2. Details about experiments included in these analyses. Experiment indicates the name of the experiment included in the analysis. Site:Community Type indicates the experimental site at which the experiment is housed, and if the site has multiple community types sampled then which community types were considered. Lat and Long indicate the latitude and longitude of the site, respectively. Years indicates length of experiment in years; # trt indicates the number of treatments from the experiment that were included in our analysis; manipulation indicates the types of global change driver the experiment manipulated (B=burning, C=CO<sub>2</sub>, H=herbivore presence, L=tilling, M=mowing/clipping, N=nutrients, P=plant manipulation, T=temperature, W=water); MAP indicates mean annual precipitation at the site (mm); MAT indicates mean annual temperature at the site (°C); gamma diversity indicates the rarefied number of species across all plots and years within each experiment; ANPP indicates average aboveground net primary productivity (g m<sup>-2</sup>) under control conditions within the experiment.

| <b>Experiment</b> | <b>Site:Community Type</b>                           | <b>Lat.</b> | <b>Long.</b> | <b>years</b> | <b>#<br/>trt</b> | <b>manipulation</b> | <b>MAP</b> | <b>MAT</b> | <b>gamma<br/>diversity</b> | <b>ANPP</b> |
|-------------------|------------------------------------------------------|-------------|--------------|--------------|------------------|---------------------|------------|------------|----------------------------|-------------|
| 246Nfert          | Niwot Ridge LTER:--                                  | 40.05       | -105.58      | 11           | 3                | N                   | 705        | -1         | 43                         | 126         |
| BFFert            | Kluane Lake:--                                       | 61.07       | -138.38      | 10           | 3                | H, N                | 369        | -4         | 28                         | 145         |
| BGP               | Konza LTER:--                                        | 39.08       | -96.58       | 25           | 15               | B, M, N             | 866        | 12         | 60                         | 407         |
| BioCON            | Cedar Creek LTER:--                                  | 45.40       | -93.20       | 14           | 3                | C, N                | 750        | 6          | 14                         | 397         |
| Bowman            | Niwot Ridge LTER:dry<br>meadow                       | 40.05       | -105.58      | 11           | 3                | N                   | 705        | -1         | 50                         | 152         |
| Bowman            | Niwot Ridge LTER:wet<br>meadow                       | 40.05       | -105.58      | 7            | 3                | N                   | 705        | -1         | 32                         | 265         |
| CCD               | Gap Prairie Farm Rehabilitation<br>Administration:-- | 49.34       | -104.66      | 3            | 11               | M, T, W             | 357        | 3          | 18                         | 132         |
| CCD               | Kinsella Research Ranch:--                           | 53.00       | -111.52      | 3            | 17               | M, T, W             | 430        | 1          | 20                         | 191         |
| CCD               | Riding Mountain National<br>Park:--                  | 50.66       | -99.97       | 3            | 11               | M, T, W             | 513        | 0          | 28                         | 282         |
| CLIP              | Latnjajaure Field Station:heath                      | 69.35       | 18.48        | 7            | 3                | N, T                | 818        | 1          | 7                          | 476         |
| CLIP              | Latnjajaure Field<br>Station:meadow                  | 69.35       | 18.48        | 7            | 3                | N, T                | 818        | 1          | 7                          | 383         |
| Clonal            | Allegan State Game Area:--                           | 42.55       | -85.99       | 10           | 7                | N, P                | 940        | 8          | 46                         | 211         |
| Culardoch         | Culardoch Experimental Site:--                       | 57.07       | -3.33        | 6            | 7                | B, M, N             | 1118       | 4          | 23                         | 105         |
| CXN               | Smithsonian Environmental<br>Research Center:--      | 38.87       | -76.55       | 10           | 3                | C, N                | 1072       | 13         | 3                          | 637         |
| e001              | Cedar Creek LTER:Field A                             | 45.40       | -93.20       | 31           | 3                | N                   | 750        | 6          | 27                         | 511         |

| <b>Experiment</b> | <b>Site:Community Type</b>                      | <b>Lat.</b> | <b>Long.</b> | <b>years</b> | <b>#<br/>trt</b> | <b>manipulation</b> | <b>MAP</b> | <b>MAT</b> | <b>gamma<br/>diversity</b> | <b>ANPP</b> |
|-------------------|-------------------------------------------------|-------------|--------------|--------------|------------------|---------------------|------------|------------|----------------------------|-------------|
| e001              | Cedar Creek LTER:Field B                        | 45.40       | -93.20       | 31           | 3                | N                   | 750        | 6          | 27                         | 422         |
| e001              | Cedar Creek LTER:Field C                        | 45.40       | -93.20       | 31           | 3                | N                   | 750        | 6          | 34                         | 614         |
| e001              | Cedar Creek LTER:Field D                        | 45.40       | -93.20       | 31           | 3                | N                   | 750        | 6          | 46                         | 519         |
| e002              | Cedar Creek LTER:Field A                        | 45.40       | -93.20       | 10           | 3                | N                   | 750        | 6          | 23                         | 170         |
| e002              | Cedar Creek LTER:Field B                        | 45.40       | -93.20       | 10           | 3                | N                   | 750        | 6          | 24                         | 230         |
| e002              | Cedar Creek LTER:Field C                        | 45.40       | -93.20       | 10           | 3                | N                   | 750        | 6          | 42                         | 288         |
| E6                | Kansas University Field<br>Station:type 1       | 39.05       | -95.20       | 11           | 7                | N                   | 965        | 12         | 11                         | 301         |
| E6                | Kansas University Field<br>Station:type 2       | 39.05       | -95.20       | 11           | 7                | N                   | 965        | 12         | 11                         | 301         |
| EDGE              | Central Plains Experimental<br>Range:--         | 40.82       | -104.57      | 4            | 2                | W                   | 366        | 10         | 42                         | 94          |
| EDGE              | High Plains Grassland Research<br>Station:--    | 41.18       | -104.90      | 4            | 2                | W                   | 415        | 8          | 55                         | 137         |
| EDGE              | Konza LTER:--                                   | 39.08       | -96.58       | 4            | 2                | W                   | 866        | 12         | 43                         | 413         |
| EDGE              | Saline Experimental Range:--                    | 39.09       | -99.14       | 4            | 2                | W                   | 581        | 12         | 68                         | 246         |
| EDGE              | Sevilleta LTER:EB                               | 34.40       | -106.67      | 5            | 3                | W                   | 231        | 12         | 47                         | 66          |
| EDGE              | Sevilleta LTER:EG                               | 34.40       | -106.67      | 5            | 3                | W                   | 231        | 12         | 36                         | 98          |
| EVENT2            | Ecological-Botanical Garden:--                  | 49.92       | 11.58        | 5            | 3                | W                   | 674        | 8          | 34                         | 612         |
| Exp1              | Allegan State Game Area:--                      | 42.55       | -85.99       | 8            | 5                | N, P                | 940        | 8          | 36                         | 141         |
| FACE              | Pontville Small Arms Range<br>Complex:--        | -42.70      | 147.27       | 8            | 3                | C, T                | 647        | 11         | 20                         | 285         |
| FACE              | Oak Ridge National<br>Laboratory:--             | 35.90       | -84.33       | 11           | 1                | C                   | 1356       | 13         | 32                         | 169         |
| Fireplots         | Macarthur Agro-Ecological<br>Research Center:-- | 27.15       | -81.20       | 9            | 15               | B, H, N             | 1218       | 22         | 58                         | 967         |
| GANE              | Svalbard:--                                     | 78.93       | 11.83        | 3            | 5                | N                   | 414        | -7         | 13                         | 2           |
| GB                | Northern Great Basin<br>Experimental Range:--   | 43.48       | -119.72      | 6            | 3                | W                   | 269        | 7          | 18                         | 407         |
| GCE               | Jasper Ridge Biological<br>Station:--           | 37.38       | -122.23      | 13           | 15               | C, N, T, W          | 675        | 13         | 25                         | 400         |

| <b>Experiment</b> | <b>Site:Community Type</b>                   | <b>Lat.</b> | <b>Long.</b> | <b>years</b> | <b># trt</b> | <b>manipulation</b> | <b>MAP</b> | <b>MAT</b> | <b>gamma diversity</b> | <b>ANPP</b> |
|-------------------|----------------------------------------------|-------------|--------------|--------------|--------------|---------------------|------------|------------|------------------------|-------------|
| GFP               | Konza LTER:20 year burn                      | 39.08       | -96.58       | 3            | 3            | M, W                | 866        | 12         | 36                     | 490         |
| GFP               | Konza LTER:4 year burn                       | 39.08       | -96.58       | 3            | 3            | M, W                | 866        | 12         | 35                     | 368         |
| GFP               | Konza LTER:annual burn                       | 39.08       | -96.58       | 3            | 3            | M, W                | 866        | 12         | 35                     | 469         |
| GFP               | Kruger National Park:--                      | -24.40      | 31.78        | 3            | 3            | M, W                | 573        | 22         | 25                     | 567         |
| GrazePrecip       | SFREC:G2                                     | 39.25       | -121.28      | 3            | 2            | H, W                | 1019       | 15         | 18                     | 323         |
| GrazePrecip       | SFREC:G4                                     | 39.25       | -121.28      | 3            | 2            | H, W                | 1019       | 15         | 19                     | 323         |
| HerbDiv           | Wichita State Ninnescah Reserve:--           | 37.53       | -97.67       | 6            | 8            | H, N                | 752        | 13         | 49                     | 721         |
| HerbWood          | Langi Ghiran State Park:--                   | -37.30      | 143.08       | 3            | 3            | N, W                | 666        | 12         | 51                     | 15          |
| Imagine           | Clermont Climate Change Experiment:--        | 45.71       | -3.02        | 4            | 3            | C, T, W             | 780        | 9          | 12                     | 489         |
| Interaction       | Rio Mayo Experimental Station:--             | -45.68      | -70.27       | 4            | 5            | N, W                | 183        | 9          | 9                      | 57          |
| IRG               | Konza LTER:lowland                           | 39.08       | -96.58       | 19           | 1            | W                   | 866        | 12         | 37                     | 498         |
| IRG               | Konza LTER:upland                            | 39.08       | -96.58       | 19           | 1            | W                   | 866        | 12         | 39                     | 491         |
| KGfert            | Kluane Lake:--                               | 61.07       | -138.38      | 7            | 3            | N                   | 369        | -4         | 7                      | 139         |
| LIND              | Lindenhof Environmental Station:--           | 49.92       | 11.58        | 3            | 9            | P, W                | 674        | 8          | 30                     | 648         |
| Lovegrass         | Trattin:--                                   | -27.74      | 151.14       | 3            | 11           | H, M, N, P          | 678        | 18         | 29                     | 750         |
| Lucero            | San Claudio:--                               | -35.88      | -61.08       | 6            | 1            | N                   | 978        | 15         | 49                     | 904         |
| MAT2              | Arctic LTER:--                               | 68.63       | -149.60      | 14           | 1            | N                   | 229        | -12        | 20                     | 185         |
| MEGARICH          | Center for Ecology & Hydrology, Bangor:--    | 53.28       | -4.57        | 4            | 3            | C, M, N, T          | 873        | 9          | 20                     | 780         |
| MNT               | Arctic LTER:--                               | 68.63       | -149.60      | 11           | 1            | N                   | 229        | -12        | 52                     | 150         |
| NDE               | Inner Mongolia Grassland Research Station:-- | 43.43       | 116.07       | 6            | 17           | M, N                | 331        | 0          | 18                     | 214         |
| NFert             | Sevilleta LTER:--                            | 34.40       | -106.67      | 18           | 1            | N                   | 231        | 12         | 48                     | 70          |
| NitAdd            | Yunwu Mountain National Natural Reserve:--   | 36.25       | 106.41       | 3            | 5            | N                   | 447        | 6          | 27                     | 242         |

| Experiment | Site:Community Type                                   | Lat.  | Long.   | years | # trt | manipulation | MAP  | MAT | gamma diversity | ANPP |
|------------|-------------------------------------------------------|-------|---------|-------|-------|--------------|------|-----|-----------------|------|
| NitPhos    | Azi Branch Research Station:--                        | 33.67 | 101.85  | 4     | 6     | N            | 681  | 1   | 55              | 420  |
| Nitrogen   | Sedgwick Reserve:annual                               | 34.70 | -120.04 | 5     | 3     | N            | 537  | 14  | 22              | 285  |
| Nitrogen   | Sedgwick Reserve:perennial                            | 34.70 | -120.04 | 5     | 3     | N            | 537  | 14  | 20              | 193  |
| NSFC       | Restoration Ecological Research Station:--            | 42.03 | 116.28  | 8     | 3     | N, W         | 386  | 1   | 32              | 165  |
| PME        | Lefthand Canyon:--                                    | 40.12 | -105.30 | 4     | 4     | W            | 409  | 9   | 24              | 200  |
| PPlots     | Konza LTER:--                                         | 39.08 | -96.58  | 12    | 7     | N            | 866  | 12  | 41              | 472  |
| PQ         | Buxton Health and Safety Laboratory:--                | 53.23 | -1.92   | 16    | 5     | T, W         | 1146 | 8   | 37              | 380  |
| RaMPs      | Konza LTER:--                                         | 39.08 | -96.58  | 16    | 3     | T, W         | 866  | 12  | 48              | 773  |
| RHPs       | Konza LTER:--                                         | 39.08 | -96.58  | 9     | 3     | N            | 866  | 12  | 36              | 640  |
| RMAPC      | Teberda Biosphere Reserve:alpine lichen heath         | 43.45 | 41.68   | 9     | 5     | N, W         | 934  | 2   | 34              | 149  |
| RMAPC      | Teberda Biosphere Reserve:Festuca grassland           | 43.45 | 41.68   | 9     | 5     | N, W         | 934  | 2   | 29              | 240  |
| RMAPC      | Teberda Biosphere Reserve:Geranium meadow             | 43.45 | 41.68   | 9     | 5     | N, W         | 934  | 2   | 24              | 301  |
| RMAPC      | Teberda Biosphere Reserve:snowbed                     | 43.45 | 41.68   | 9     | 5     | N, W         | 934  | 2   | 21              | 121  |
| Salt Marsh | Carpenteria Salt Marsh Reserve:high marsh zone MA     | 34.40 | -119.53 | 7     | 1     | N            | 574  | 14  | 5               | 1415 |
| Salt Marsh | Carpenteria Salt Marsh Reserve:high marsh zone S      | 34.40 | -119.53 | 7     | 1     | N            | 574  | 14  | 5               | 1415 |
| Salt Marsh | Carpenteria Salt Marsh Reserve:low marsh zone DS      | 34.40 | -119.53 | 7     | 1     | N            | 574  | 14  | 5               | 1415 |
| Salt Marsh | Carpenteria Salt Marsh Reserve:low marsh zone JS      | 34.40 | -119.53 | 7     | 1     | N            | 574  | 14  | 3               | 1415 |
| Salt Marsh | Carpenteria Salt Marsh Reserve:low marsh zone S       | 34.40 | -119.53 | 7     | 1     | N            | 574  | 14  | 5               | 1415 |
| Salt Marsh | Carpenteria Salt Marsh Reserve:mid-high marsh zone AS | 34.40 | -119.53 | 7     | 1     | N            | 574  | 14  | 4               | 1415 |

| Experiment | Site:Community Type                                    | Lat.   | Long.   | years | #<br>trt | manipulation | MAP  | MAT | gamma<br>diversity | ANPP |
|------------|--------------------------------------------------------|--------|---------|-------|----------|--------------|------|-----|--------------------|------|
| Snow       | Niwot Ridge LTER:--<br>Jornada LTER:Bajada             | 40.05  | -105.58 | 6     | 7        | N, T, W      | 705  | -1  | 26                 | 240  |
| Study 119  | shrubland                                              | 32.53  | -106.72 | 5     | 1        | N            | 256  | 14  | 50                 | 104  |
| Study 119  | Jornada LTER:basin slopes                              | 32.53  | -106.72 | 5     | 1        | N            | 256  | 14  | 64                 | 113  |
| Study 119  | Jornada LTER:piedmont                                  | 32.53  | -106.72 | 5     | 1        | N            | 256  | 14  | 66                 | 79   |
| Study 119  | Jornada LTER:playa                                     | 32.53  | -106.72 | 5     | 1        | N            | 256  | 14  | 22                 | 199  |
| Study 278  | Jornada LTER:--                                        | 32.53  | -106.72 | 3     | 9        | N, W         | 256  | 14  | 15                 | 173  |
| T7         | Kellogg Biological Station:--                          | 42.40  | -85.37  | 24    | 3        | N, L         | 912  | 8   | 54                 | 438  |
| TER        | San Claudio:--                                         | -35.88 | -61.08  | 4     | 3        | M, N         | 978  | 15  | 70                 | 676  |
| TIDE       | Plum Island Estuary LTER:--                            | 42.75  | -70.87  | 8     | 1        | N            | 1151 | 9   | 8                  | 1002 |
| TMECE      | Smithsonian Environmental<br>Research Center:mixed     | 38.87  | -76.55  | 27    | 1        | C            | 1072 | 13  | 4                  | 611  |
| TMECE      | Smithsonian Environmental<br>Research Center:Spartina  | 38.87  | -76.55  | 27    | 1        | C            | 1072 | 13  | 5                  | 629  |
| TMECE      | Smithsonian Environmental<br>Research Center:Scirpus   | 38.87  | -76.55  | 27    | 1        | C            | 1072 | 13  | 5                  | 758  |
| UK         | Spindletop Research Farm:--                            | 38.17  | -84.82  | 5     | 3        | T, W         | 1156 | 12  | 24                 | 253  |
| WAPAClip   | Kessler Atmospheric and<br>Ecological Field Station:-- | 34.98  | -97.52  | 3     | 11       | M, T, W      | 899  | 16  | 33                 | 403  |
| WarmNut    | Finse:--                                               | 60.00  | 7.00    | 8     | 3        | N, T         | 1030 | 0   | 79                 | 95   |
| Water      | Sedgewick Reserve:annual                               | 34.70  | -120.04 | 5     | 7        | H, P, W      | 537  | 14  | 21                 | 306  |
| Water      | Sedgewick Reserve:perennial                            | 34.70  | -120.04 | 5     | 7        | H, P, W      | 537  | 14  | 19                 | 254  |
| watering   | Angelo Coast Range Reserve:--                          | 39.74  | -123.63 | 13    | 2        | W            | 1526 | 10  | 32                 | 176  |
| watfer     | McLaughlin Natural Reserve:--                          | 38.85  | -123.83 | 5     | 3        | N, W         | 1049 | 11  | 32                 | 25   |
| WENNDEx    | Sevilleta LTER:--                                      | 34.40  | -106.67 | 7     | 7        | N, W         | 231  | 12  | 32                 | 89   |
| Wet        | Nanticoke River<br>Watershed:BRC marsh                 | 38.55  | -75.73  | 4     | 3        | N            | 1110 | 13  | 16                 | 166  |
| Wet        | Nanticoke River<br>Watershed:BRC swamp                 | 38.55  | -75.73  | 4     | 3        | N            | 1110 | 13  | 13                 | 23   |
| Wet        | Nanticoke River<br>Watershed:BSA marsh                 | 38.55  | -75.73  | 4     | 3        | N            | 1110 | 13  | 20                 | 283  |

| <b>Experiment</b> | <b>Site:Community Type</b>                      | <b>Lat.</b> | <b>Long.</b> | <b>years</b> | <b>#<br/>trt</b> | <b>manipulation</b> | <b>MAP</b> | <b>MAT</b> | <b>gamma<br/>diversity</b> | <b>ANPP</b> |
|-------------------|-------------------------------------------------|-------------|--------------|--------------|------------------|---------------------|------------|------------|----------------------------|-------------|
| Wet               | Nanticoke River<br>Watershed:BSA swamp          | 38.55       | -75.73       | 4            | 3                | N                   | 1110       | 13         | 40                         | 37          |
| Wet               | Nanticoke River<br>Watershed:TNC marsh          | 38.55       | -75.73       | 3            | 3                | N                   | 1110       | 13         | 30                         | 256         |
| Wet               | Nanticoke River<br>Watershed:TNC swamp          | 38.55       | -75.73       | 4            | 3                | N                   | 1110       | 13         | 46                         | 83          |
| Yu                | Inner Mongolia Grassland<br>Research Station:-- | 43.43       | 116.07       | 8            | 6                | N                   | 331        | 0          | 17                         | 147         |

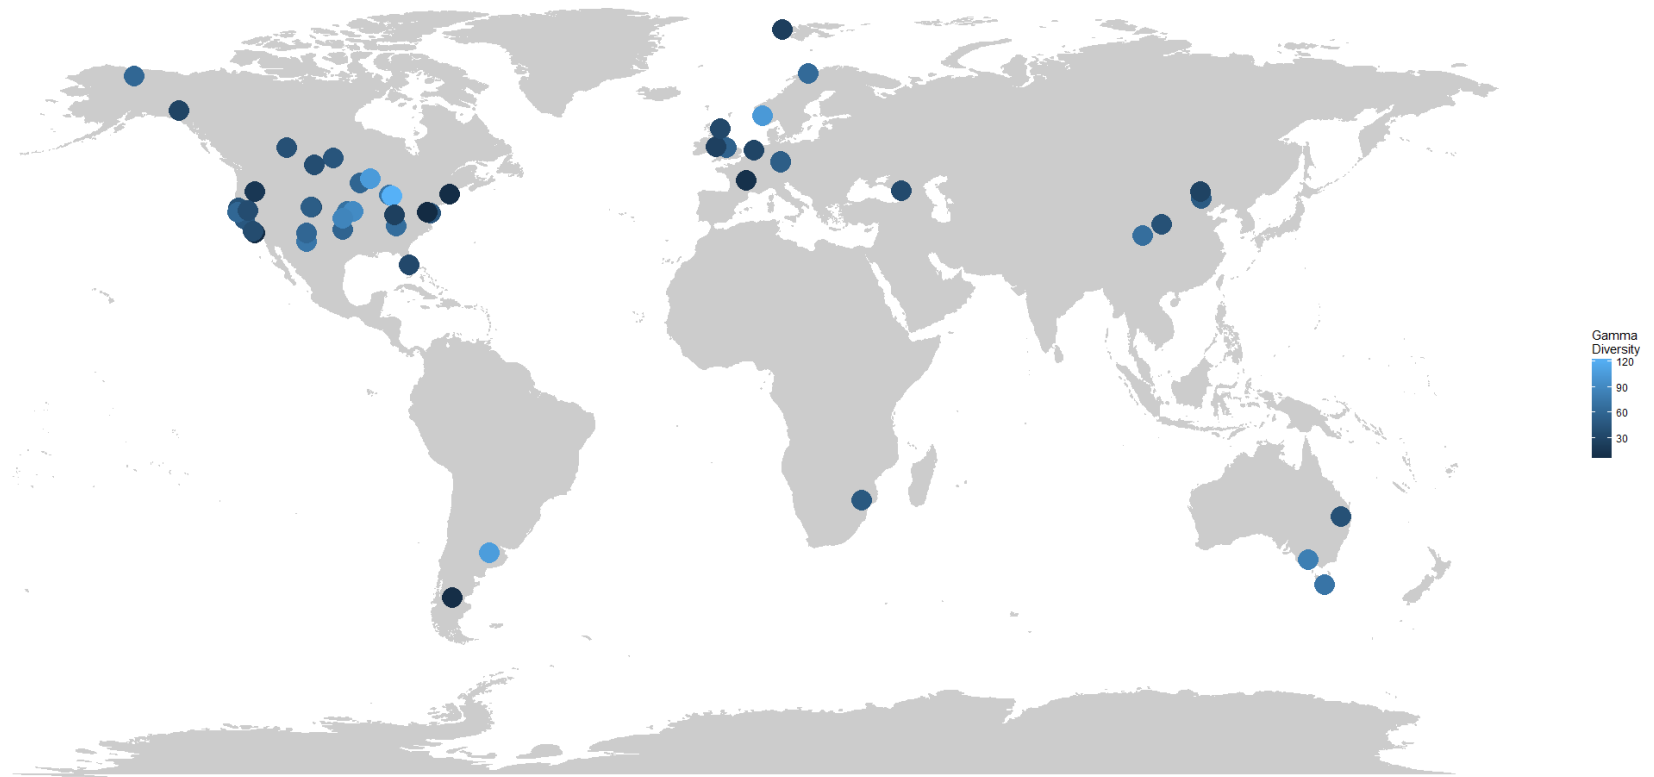

Appendix 3. Map of the 52 sites with experiments included in these analyses, with points colored by gamma diversity (averaged across all experiments at the site if more than one experiment is present).

Appendix 4: Standardized parameter estimates for the effects of global change manipulations on temporal trends of community differences (lnRR richness, composition difference), and the effects of site-level (gamma) diversity and aboveground net primary productivity (ANPP). Linear slopes are indicative of the linear component of the temporal trends, and quadratic slopes are indicative of the quadratic component of the temporal trends. Shown are median posterior estimates and standard deviations (std dev). Parameters with 95% confidence intervals not encompassing zero are considered significant and are indicated by bold text.

| <b>Response Variable</b> | <b>Explanatory Variable</b> | <b>Parameter</b>    | <b>Estimate</b> | <b>Std Dev</b> |
|--------------------------|-----------------------------|---------------------|-----------------|----------------|
| lnRR Richness            | Gamma Diversity             | linear slope        | 0.0086          | 0.0228         |
| lnRR Richness            | Gamma Diversity             | quadratic slope     | 0.0366          | 0.0247         |
| <b>lnRR Richness</b>     | <b>ANPP</b>                 | <b>linear slope</b> | <b>0.0481</b>   | <b>0.0228</b>  |
| lnRR Richness            | ANPP                        | quadratic slope     | 0.0001          | 0.0238         |
| Composition Difference   | Gamma Diversity             | linear slope        | -0.0067         | 0.0169         |
| Composition Difference   | Gamma Diversity             | quadratic slope     | -0.0038         | 0.0184         |
| Composition Difference   | ANPP                        | linear slope        | -0.0119         | 0.0207         |
| Composition Difference   | ANPP                        | quadratic slope     | 0.0032          | 0.0213         |



Appendix 5: For treatments that exhibited parabolic treatment responses (10.5% of richness and 10.1% of composition responses), changes in (a) lnRR richness and (b) composition in control and treatment plots through time were higher than differences between the control and treatment plots in the first year of an experiment, indicating that control and treatment plots are converging in composition because control plots are diverging from their initial state to become more similar to the treatment plots through time. Initial diff: difference between treatment and control communities in the first year of the experiment; ctl change: comparison of community change in controls plots between first and last year of the experiment; trt change: comparison of community change in treatment plots between first and last year of the experiment. Shown are means $\pm$ SE of the magnitude of response, with significant differences among means indicated by different letters.

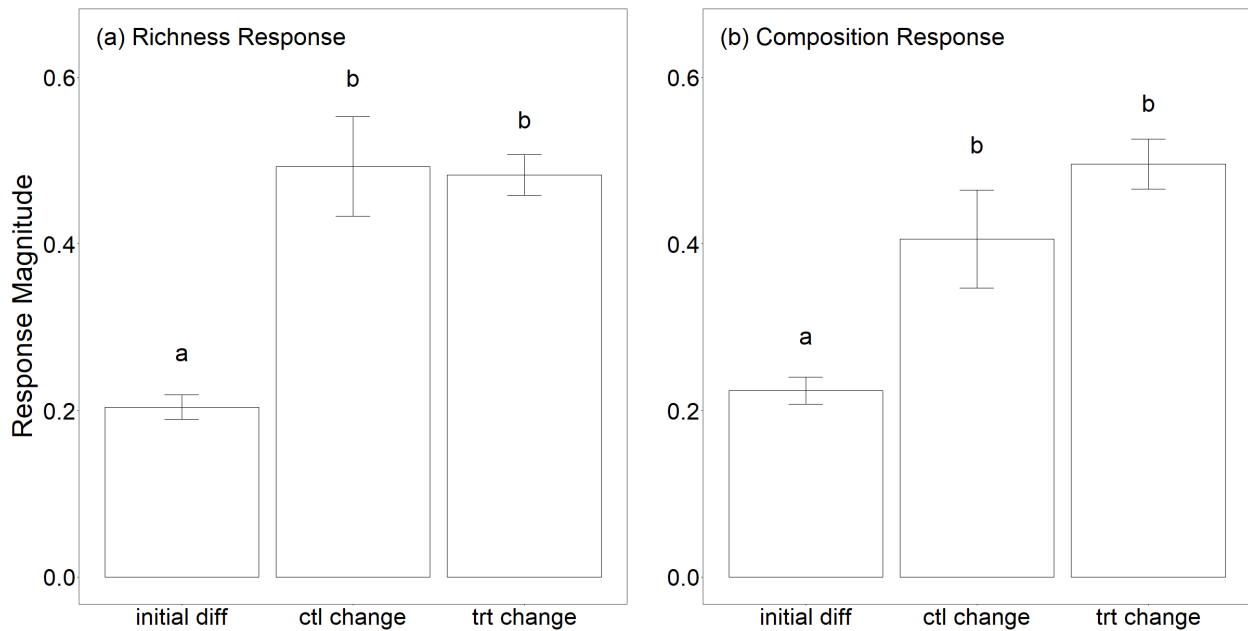

Appendix 6: Table of regression coefficients to examine the effects of nitrogen, drought, and irrigation treatment magnitudes on richness and compositional responses. Bold text indicates significant effects (*i.e.*, confidence interval for the effect size does not overlap 0).

|                                     | Mean Effect   | Lower CI      | Upper CI      |
|-------------------------------------|---------------|---------------|---------------|
| <i>(a) Nitrogen – richness</i>      |               |               |               |
| Intercept                           | -0.144        | -0.382        | 0.094         |
| <b>N</b>                            | <b>-0.479</b> | <b>-0.803</b> | <b>-0.154</b> |
| MAP                                 | -0.146        | -0.384        | 0.091         |
| <b>N*MAP</b>                        | <b>0.378</b>  | <b>0.115</b>  | <b>0.640</b>  |
| <i>(b) Nitrogen – composition</i>   |               |               |               |
| Intercept                           | 0.073         | -0.167        | 0.312         |
| N                                   | 0.313         | -0.010        | 0.636         |
| <b>MAP</b>                          | <b>0.270</b>  | <b>0.029</b>  | <b>0.511</b>  |
| N*MAP                               | -0.190        | -0.453        | 0.074         |
| <i>(c) Drought – richness</i>       |               |               |               |
| Intercept                           | 0.017         | -0.371        | 0.404         |
| Drought                             | -0.234        | -0.657        | 0.189         |
| MAP                                 | -0.390        | -0.791        | 0.011         |
| Drought*MAP                         | -0.069        | -0.449        | 0.310         |
| <i>(d) Drought – composition</i>    |               |               |               |
| Intercept                           | -0.021        | -0.467        | 0.426         |
| Drought                             | -0.170        | -0.660        | 0.321         |
| MAP                                 | -0.073        | -0.531        | 0.384         |
| Drought*MAP                         | 0.092         | -0.344        | 0.528         |
| <i>(e) Irrigation – richness</i>    |               |               |               |
| Intercept                           | 0.023         | -0.362        | 0.409         |
| Irrigation                          | -0.069        | -0.453        | 0.315         |
| <b>MAP</b>                          | <b>-0.431</b> | <b>-0.833</b> | <b>-0.029</b> |
| Irrigation*MAP                      | 0.069         | -0.405        | 0.543         |
| <i>(f) Irrigation – composition</i> |               |               |               |
| Intercept                           | -0.030        | -0.445        | 0.385         |
| Irrigation                          | -0.145        | -0.562        | 0.273         |
| MAP                                 | 0.136         | -0.293        | 0.565         |
| Irrigation*MAP                      | -0.093        | -0.602        | 0.416         |

Appendix 7. Experiment and Site Acknowledgements.

| <b>Experiment</b> | <b>Site</b>                                                                                            | <b>Funding Source</b>                                                                                                                                                      |
|-------------------|--------------------------------------------------------------------------------------------------------|----------------------------------------------------------------------------------------------------------------------------------------------------------------------------|
|                   | Arctic LTER                                                                                            | U.S. National Science Foundation DEB 0423385 and 1026843                                                                                                                   |
|                   | Cedar Creek LTER                                                                                       | U.S. National Science Foundation 1234162                                                                                                                                   |
|                   | Konza Prairie LTER                                                                                     | U.S. National Science Foundation                                                                                                                                           |
|                   | Jornada Basin LTER                                                                                     | U.S. National Science Foundation DEB-1235828, DEB 1354732, DEB 1754106                                                                                                     |
|                   | Niwot Ridge LTER                                                                                       | U.S. National Science Foundation DEB-1027341                                                                                                                               |
|                   | San Claudio                                                                                            | UBACyT 20020100100615BA, 20020120300076BA, G024, and G046                                                                                                                  |
|                   | Sevilleta LTER                                                                                         | U.S. National Science Foundation                                                                                                                                           |
|                   | SFREC                                                                                                  | U.S. National Science Foundation 20121208, U.S. Department of Agriculture 2006-01350                                                                                       |
|                   | Smithsonian Environmental Research Center                                                              | U.S. National Science Foundation DEB-0950080, DEB-1457100, DEB-1557009; U.S. Department of Energy DE-SC0008339; U.S. Geological Survey G10AC00675; Smithsonian Institution |
| BFFert/KGFert     | Kluane Lake                                                                                            | NSERC Discovery Grant                                                                                                                                                      |
| BioCON            | Cedar Creek LTER                                                                                       | U.S. National Science Foundation DEB-1234162, DEB-0716587, DEB-1242531, DEB- 1120064                                                                                       |
| Culardoch         | Culardoch Experimental Site                                                                            | Rural and Environment Science and Analytical Services Division of the Scottish Government                                                                                  |
| CCD               | Gap Prairie Farm Rehabilitation Administration, Kinsella Research Ranch, Riding Mountain National Park | Natural Sciences and Engineering Research Council Discovery and Strategic Grant                                                                                            |
| CLIP              | Latnjajaure Field Station                                                                              | Carl Tryggers stiftelse för vetenskaplig forskning and Qatar Petroleum                                                                                                     |
| E6                | Kansas University Field Station                                                                        | U.S. National Science Foundation DEB 1655500 and DEB 950100                                                                                                                |
| Fireplots         | Macarthur Agro-Ecological Research Center                                                              | Archbold Biological Station                                                                                                                                                |
| GANE              | Svalbard                                                                                               | UK Natural Environment Research Council Global Atmospheric Nitrogen Enrichment Program                                                                                     |

|          |                                           |                                                                                                                                                                                                                                 |
|----------|-------------------------------------------|---------------------------------------------------------------------------------------------------------------------------------------------------------------------------------------------------------------------------------|
| Imagine  | Clermont Climate Change Experiment        | IFB-GICC IMAGINE; ANR QDIV, VALIDATE                                                                                                                                                                                            |
| FACE     | Oak Ridge National Laboratory             | U.S. Department of Energy DE-AC05-00-OR22725                                                                                                                                                                                    |
| FACE     | Pontville Small Arms Range Complex:--     | Australian Research Council Discovery Projects Scheme Grants DP0451686, DP0772319, DP0984779                                                                                                                                    |
| NDE      | Inner Mongolia Grassland Research Station | International Postdoctoral Exchange Fellowship Program 20170070; National Key R&D program of China 2016YFC0500700                                                                                                               |
| MEGARICH | Center for Ecology & Hydrology, Bangor    | UK Natural Environment Research Council; UK Department for Environment, Food and Rural Affairs Project CC0359; European Union EV5V-CT-93-5213                                                                                   |
| RaMPs    | Konza LTER                                | U.S. National Science Foundation DEB-1257174                                                                                                                                                                                    |
| RHPs     | Konza LTER                                | U.S. National Science Foundation DEB-1147439                                                                                                                                                                                    |
| RMAPC    | Teberda Biosphere Reserve                 | Governmental Contract AAAA-A16-116021660037-7 of MSU                                                                                                                                                                            |
| TIDE     | Plum Island Estuary LTER                  | U.S. National Science Foundation DEB 0213767, DEB 0816963, DEB 1354494, DEB 1719621, OCE 0423565, OCE 1058747, OCE 1238212, OCE 1637630                                                                                         |
| UK       | Spindletop Research Farm                  | U.S. Department of Energy 08-SC-NICCR-1073; USDA-ARS Forage Animal Production Research Unit 58-6440-7-135; Kentucky Agricultural Experiment Station; University of Kentucky's College of Agriculture, Food, and the Environment |
| WarmNut  | Finse                                     | Norwegian Research Council                                                                                                                                                                                                      |
| watfer   | McLaughlin Natural Reserve                | Academy of Finland 253385 and 297191                                                                                                                                                                                            |
| NitAdd   | Yunwu Mountain National Natural Reserve   | Natural Science Foundation of China 41601586, 41671289; State's Key Project of Research and Development Plan 2016YFC0500700                                                                                                     |
